# Supplementary material for: Multi-crosslinked strong, tough and anti-freezing organohydrogels for flexible sensors
Source: Royal Society of Chemistry journal article supplement (doi:10.1039/d4nr03363a), 2024-11-20
Supplement: d4nr03363a1.pdf [file d4nr03363a1.pdf]

## Supplementary information

### **Multi-crosslinked strong, tough and anti-freezing organohydrogels for flexible sensors**

Jing Wang<sup>a,b,d,#</sup>, Longwei Li<sup>c,#</sup>, Zi Hao Guo<sup>b</sup>, Chongxiang Pan<sup>b</sup>, Xiong Pu<sup>b,d,\*</sup>

<sup>a</sup>Guangzhou Institute of Blue Energy, Knowledge City, Huangpu District, Guangzhou 510555, China

<sup>b</sup>CAS Center for Excellence in Nanoscience, Beijing Key Laboratory of Micro-Nano Energy and Sensor, Beijing Institute of Nanoenergy and Nanosystems, Chinese Academy of Sciences, Beijing 101400, China

<sup>c</sup>Department of Computer Science and Technology, Tsinghua University, Beijing 100084, China

<sup>d</sup>School of Nanoscience and Engineering, University of Chinese Academy of Sciences. Beijing 100049, China

<sup>#</sup>These authors contributed equally.

\*Corresponding author.

E-mail: puxiong@binn.cas.cn

## Supplementary Figures

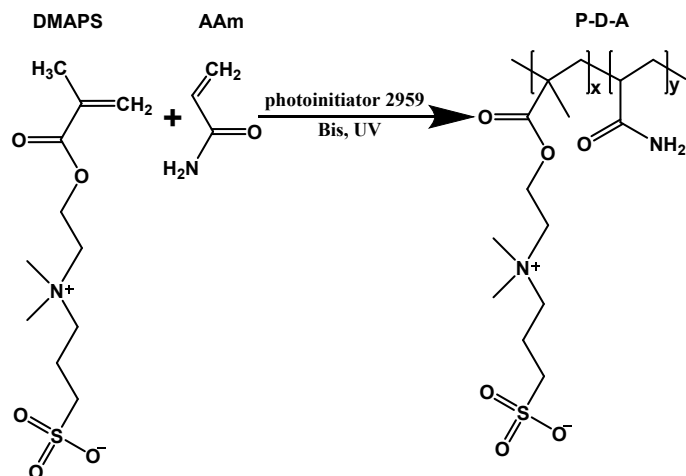

**Fig. S1** Chemical structure schematic illustration of the reaction process to synthesize the PDA block copolymer.

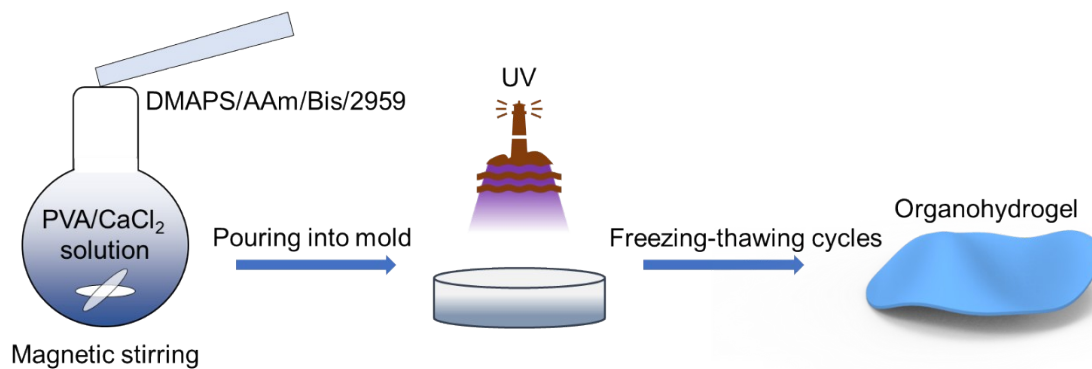

**Fig. S2** Fabrication process of the organohydrogel.

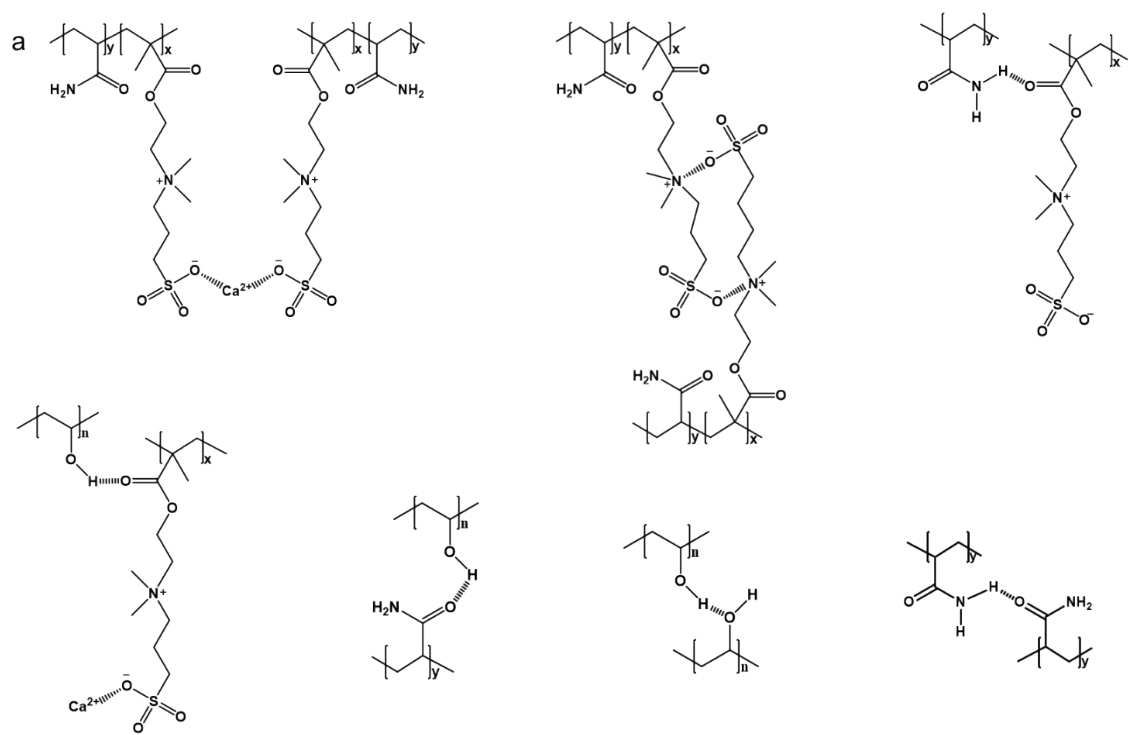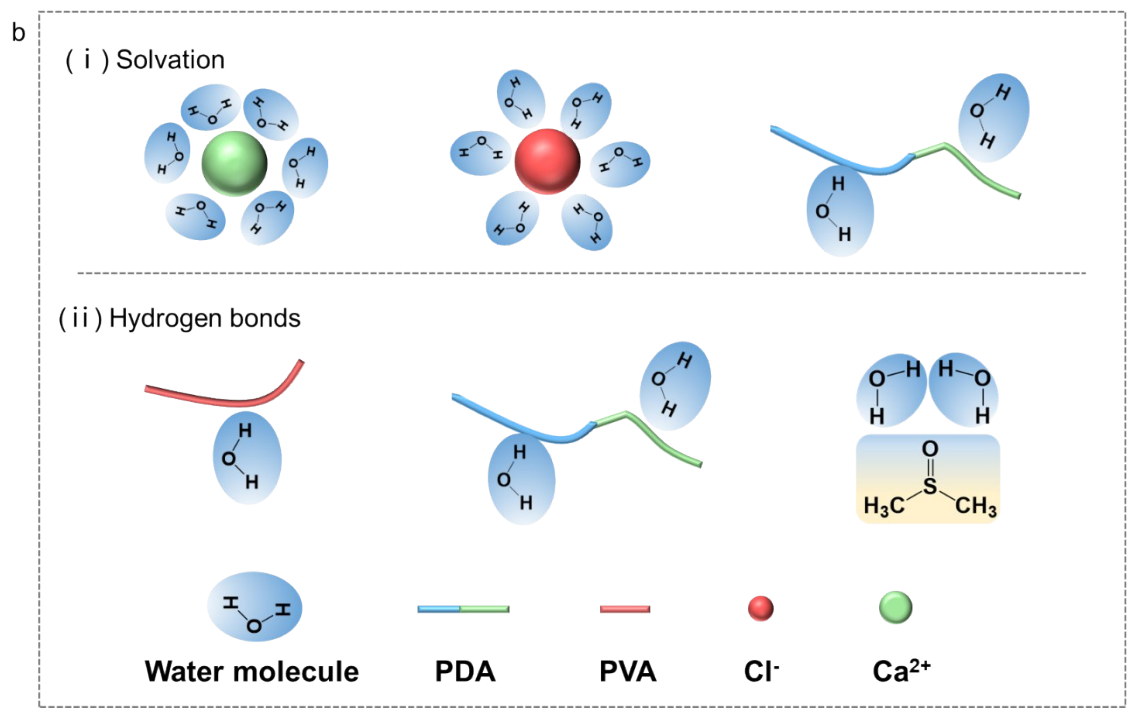

**Fig. S3** (a) Crucial chemical bonds of the organohydrogel. (b) Interactions between the water molecules and the other components.

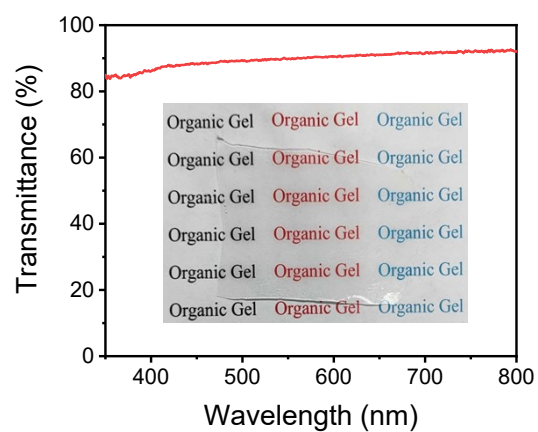

**Fig. S4** UV-vis transmittance of the organohydrogel. The insert picture is the digital photograph of the organohydrogel.

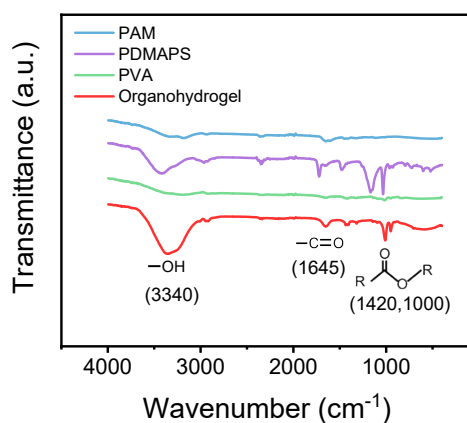

**Fig. S5** Fourier transform infrared (FT-IR) spectra of the PAM, PDMAPS, PVA hydrogels, and the organohydrogel.

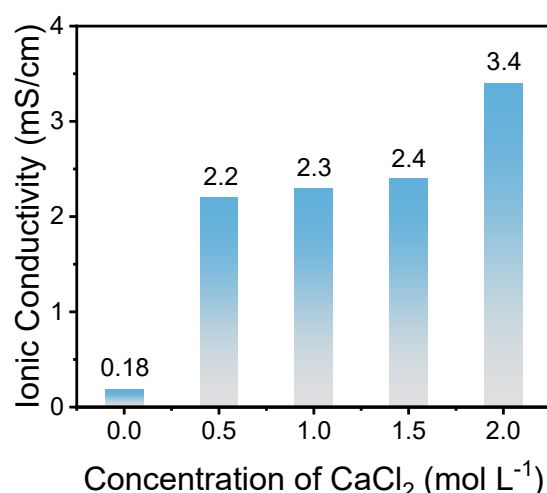

**Fig. S6** Ionic conductivities of the organohydrogels with the different CaCl<sub>2</sub> concentrations.

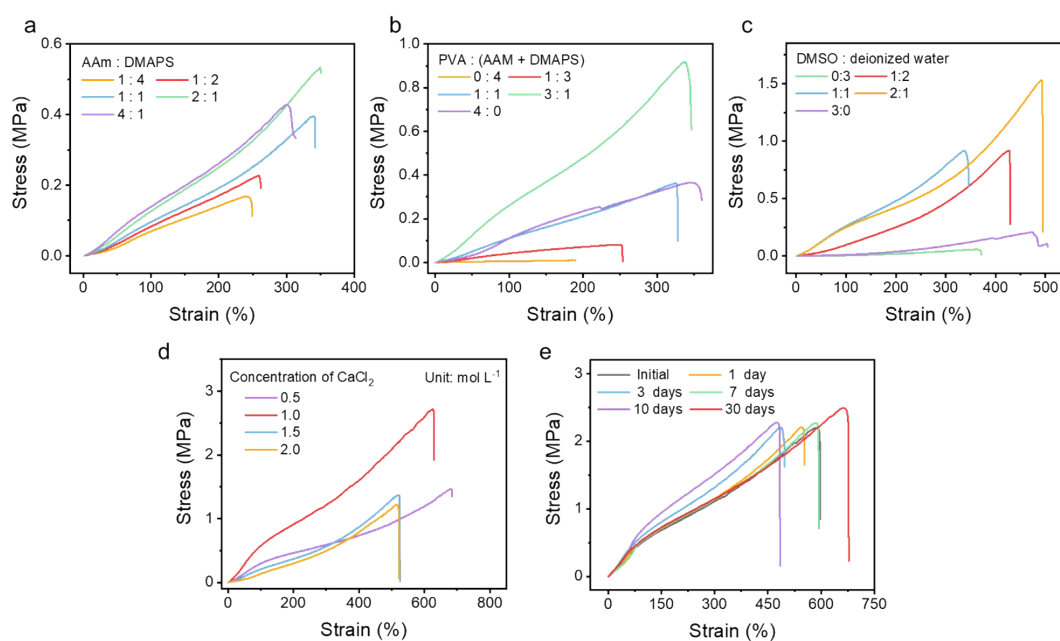

**Fig. S7** Stress-strain curves of the organohydrogels with the mass ratios of (a) AAm:DMAPS= 1:4, 1:2, 1:1, 2:1, and 4:1. (b) PVA:(AAM+DMAPS)= 0:4, 1:3, 1:1, 3:1, and 4:0. (c) DMSO: deionized water= 1:2, 1:1, and 2:1. (d) Stress-strain curves of the organohydrogels with the CaCl<sub>2</sub> concentrations of 0.5 M, 1.0 M, 1.5 M, and 2.0 M. (e) Stress-strain curves of the organohydrogels which are deposited in ambience for 1 day to 30 days.

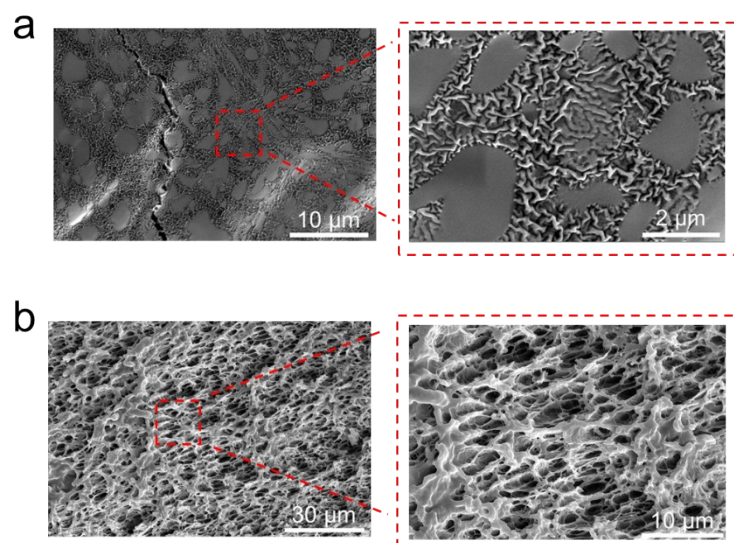

**Fig. S8** SEM images of (a) the organohydrogel and (b) the PVA hydrogel.

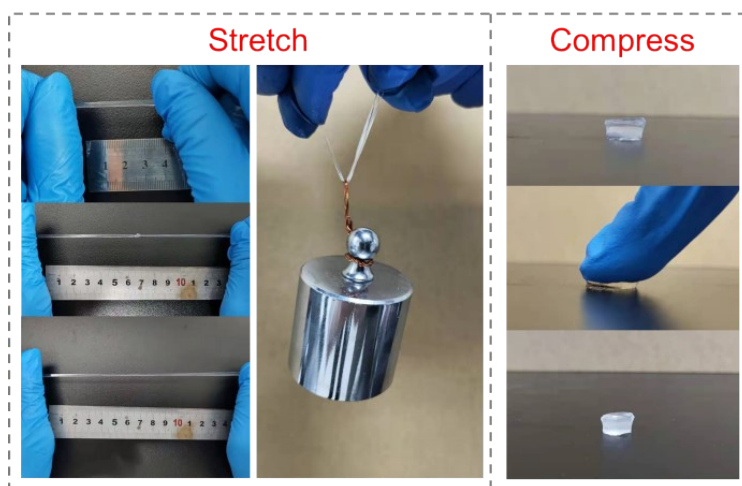

**Fig. S9** Photographs of the organohydrogels with or without knot as being stretched to 3 times the initial length, holding a 500 g weights, and compressed by human's finger.

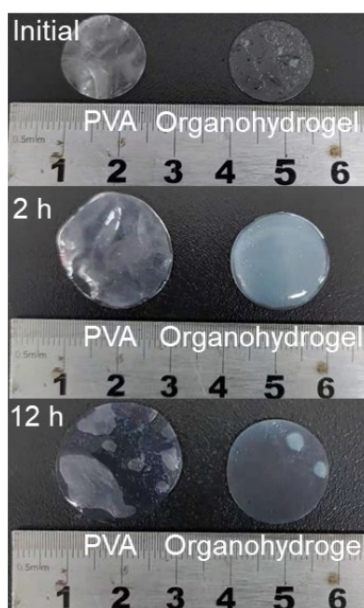

**Fig. S10** Digital photographs of the PVA hydrogel and the organohydrogel which are swelled in the deionized water for 0 h, 2 h, and 12 h.

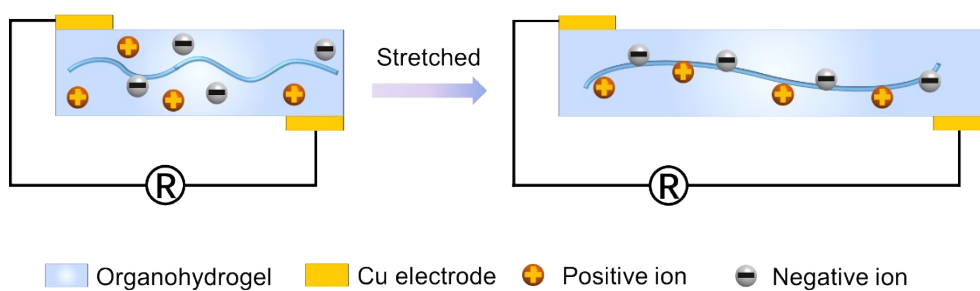

**Fig. S11** Ion distribution of the resistive mode sensor as being stretched or not.

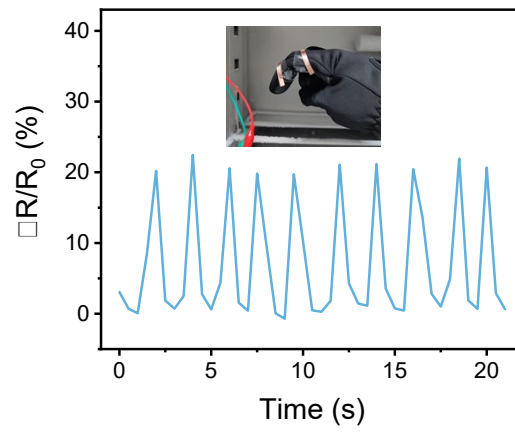

**Fig. S12** Resistive variation of the strain sensor as the human's finger is bended to 90° at sub-zero temperature (-20°C).



## Supplementary Tables

**Table S1.** The contents of all gel components.

| Gels            | Weight | Monomer                                        | Solvent                       | Inorganic salt                | Initiator        | Cross-linking agent |
|-----------------|--------|------------------------------------------------|-------------------------------|-------------------------------|------------------|---------------------|
| PVA hydrogel    |        | PVA (1.5 g)                                    | DIW (10 g)                    | —                             | —                | —                   |
| PAM hydrogel    |        | AAM (1.5 g)                                    | DIW (10 g)                    | —                             | 2959<br>(7.5 mg) | Bis<br>(7.5 mg)     |
| PDMAPS hydrogel |        | DMAPS (1.5 g)                                  | DIW (10 g)                    | —                             | 2959<br>(7.5 mg) | Bis<br>(7.5 mg)     |
| organohydrogel  |        | PVA (0.75 g)<br>DMAPS (0.08 g)<br>AAM (0.17 g) | DIW (2.22 g)<br>DMSO (4.44 g) | CaCl <sub>2</sub><br>(0.74 g) | 2959<br>(2.5 mg) | Bis<br>(1.3 mg)     |

DIW: Deionized water

Bis: N,N'-Methylenebisacrylamide

2959: Photo-initiator 2959

**Table S2.** Fracture energy and fracture strength of some reported gels.

| Gels                         | Fracture energy (J m <sup>-2</sup> ) | Fracture strength (MPa) |
|------------------------------|--------------------------------------|-------------------------|
| This work                    | 6.84                                 | 2.74                    |
| PAM-peptide-Zn <sup>2+</sup> | 1.35                                 | 0.56                    |
| P(NaSS-co-MPTC)              | 4                                    | 2.6                     |
| PAMPS-PAAm                   | 4.4                                  | 2                       |
| PS-DN                        | 2.67                                 | 1.6                     |
| Agar/HPAM                    | 1                                    | 0.267                   |
| NPs-P-PAA                    | 5.5                                  | 0.11                    |
| PDA-pGO-PAM                  | 6.78                                 | 0.17                    |
| P-DN(PAMPS/PAM)              | 3                                    | 0.47                    |
| Ionogel                      | 4.7                                  | 1                       |

**Table S3.** Full titles of the different materials.

| Abbreviation | Full title                 |
|--------------|----------------------------|
| PE           | Polyethylene               |
| PTFE         | Polytetrafluoroethylene    |
| PI           | Polyimide                  |
| PET          | Polyethylene terephthalate |

## Supplementary Notes

**Note S1.** Computational process of the mechanical strength and toughness.

### Mechanical strength:

According to the formula of  $\sigma = \frac{F}{S}$ , for the normal stress  $\sigma_0$ ,  $S_0$  is the original cross-sectional area of the sample strip. But for the true stress  $\sigma_T$ ,  $S_T$  is real-time cross-sectional area, which is decreasing as the sample is being stretched. Assuming the sample volume is constant during the tensile text, the  $S_T$  can be calculated as

$S_T = \frac{S_0}{\varepsilon + 1}$ , where,  $\varepsilon$  is the strain. So,

the true stress  $\sigma_T = \frac{F}{S_0} \times (\varepsilon + 1) = \sigma_0 \times (\varepsilon + 1)$

### Toughness:

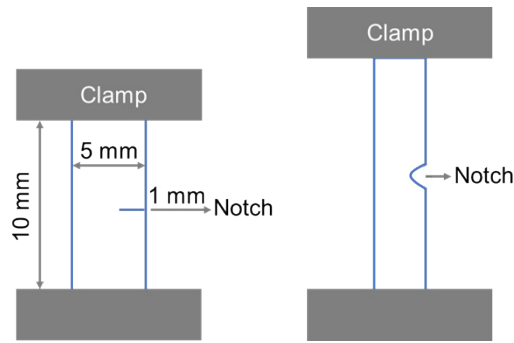

**Fig. S13** Schematic illustration of the single-edge notched elastomer used for determining the fracture energy.

According to the methodology reported in the literatures,<sup>1,2</sup> the fracture toughness of the organohydrogel can be expressed as:

$$G_c = \frac{6Wc}{\sqrt{\lambda_c}}$$

where  $\lambda_c$  is (breaking strain + 1) of the notched sample,  $c$  is length of the notch.  $W$  is the energy which is calculated by integrating the stress versus strain of the un-notched samples until  $\lambda_c$  (shaded area in Fig. 3h). The sample was notched in single-edge, and the stretching speed is 3 mm min<sup>-1</sup>.



## References

- [1] H. W. Greensmith, Rupture of rubber. X. The change in stored energy on making a small cut in a test piece held in simple extension. *J. Appl. Polym. Sci.* **1963**, 7, 993-1002.
- [2] Wang, X., Zhan, S., Lu, Z., Li, J., Yang, X., Qiao, Y., Men, Y., Sun, J., Healable, Recyclable, and Mechanically Tough Polyurethane Elastomers with Exceptional Damage Tolerance. *Adv. Mater.* **2020**, 32, 2005759.
